# Supplementary material for: The Impact of “COVID-19” and “Webinar Pandemic” on Plastic Surgery Practice in Teaching Institutes and Resident Training—A Multicentric Perspective
Source: PubMed Central journal article supplement — Indian J Plast Surg. 2022 Feb 9;55(1):45–53. doi: 10.1055/s-0041-1735425 (PMC9015845; doi:10.1055/s-0041-1735425), 2022-02-09

# IMPACT of PLASTIC SURGERY WEBINARS conducted during COVID-19 Pandemic

Following is a quick survey to objectively assess the impact of webinars on Plastic surgery education in India.

Please help us gather information that might be useful in adding valuable adjuncts to the plastic surgery training programme in our country.

Please proceed only if you're currently training as a plastic surgery resident in India.  
Thankyou.

**\*Required**

Please mention your Training Course ? \*

- Mch.
- DNB

Do you have regular academics at your institute? If YES how many hours per week ? \*

- 1-3 hrs. / week
- 3-6 hrs / week
- >6 hrs / week
- No academics

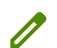

How many Plastic Surgery Conferences/ webinars have you attended during your residency, before the Covid pandemic? \*

- 0
- 1-3
- >3

What is the average hours (per week) of Plastic Surgery Webinars that you've attended during the Covid pandemic ? \*

- <4 hours per week
- 4-6 hours per week
- 6-8 hours per week
- >8 hours per week

What proportion of those webinars were arranged by international organizations? \*

- <25%
- 25-50%
- 50-75%
- >75%

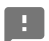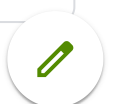

Most of the Webinars attended by you were on which of the following sections of plastic surgery? \*

Please feel free to select more than one option.

- Craniofacial & Cleft
- Hand & BPI
- Breast & Head n Neck reconstruction
- Limb reconstruction
- Burns & post burn reconstruction
- Microsurgical reconstruction
- Aesthetic
- Other:

Which of the following formats of discussion did you find most useful? \*

- Case Discussions
- Panel Discussions
- Faculty lectures
- Video Demonstrations
- Other:

Did the webinars help increase your awareness regarding plastic surgery procedures being performed nationally and/or internationally? \*

- Yes

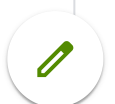

- No
- Maybe

If YES , How did it influence your outlook of the various fields of plastic surgery?

Your answer

How will you rate the Usefulness of the webinars attended during Covid pandemic on a scale of 0-10 ?

0 1 2 3 4 5 6 7 8 9 10

Not Useful at all             Extremely Useful

Which aspect of your Plastic surgical training has it helped more? \*

- Theoretical knowledge
- Operative Tips & Tricks
- Both
- Other:

Did you feel that the webinars added to your stress levels during the pandemic ?

- Definitely yes
- Maybe
- Not at all

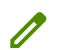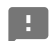

Will you like the webinars to continue post Covid 2 \*

Will you like the webinars to continue post - Covid ? \*

- Yes
- No

If YES, at what frequency would you prefer to have them ?

- weekly
- monthly
- 3 monthly
- 6 monthly or less

Should these webinars grant Credit hours for attendance like other CMEs & workshops ? \*

- Yes
- No
- Other:

Should future Plastic surgery conferences have an online portal for attendees who are not able to make it in person ? \*

- Strongly agree
- Agree
- Neutral
- Disagree
- Strongly disagree

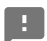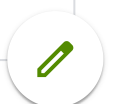

Which part of the webinars did you not like/ should be improved upon?

Please feel free to select more than one option & add to this list in the last option "Other.."

- lack of direct interaction with the speaker
- platform related issues
- connectivity issues
- coherence of speakers/moderators
- queries could not be accurately addressed
- Other:

If these webinars are paid, will you attend ? \*

- Yes
- No
- Maybe

Your valuable suggestions to help organize & conduct them better are ...

Your answer

Page 1 of 1

Submit

Never submit passwords through Google Forms.

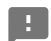

This content is neither created nor endorsed by Google. [Report Abuse](#) - [Terms of Service](#) - [Privacy Policy](#)

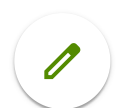

# Google Forms

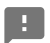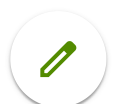

Supplement: 10-1055-s-0041-1735425-s20100945.pdf [file 10-1055-s-0041-1735425-s20100945.pdf]
